# Supplementary material for: The Oleaginous Yeast Metschnikowia pulcherrima Displays Killer Activity against Avian-Derived Pathogenic Bacteria
Source: MDPI journal article supplement (doi:10.3390/biology10121227), 2021-11-24

Image in paper – the following slides with the respective original full images of each lane, in order from left to right. I did each of the conditions in triplicate, but I've left the tag over the lane that was used in the below figure (I think for a few of them they're using the same original image, but did it for each just for continuity). Pics were taken with my iPhone.

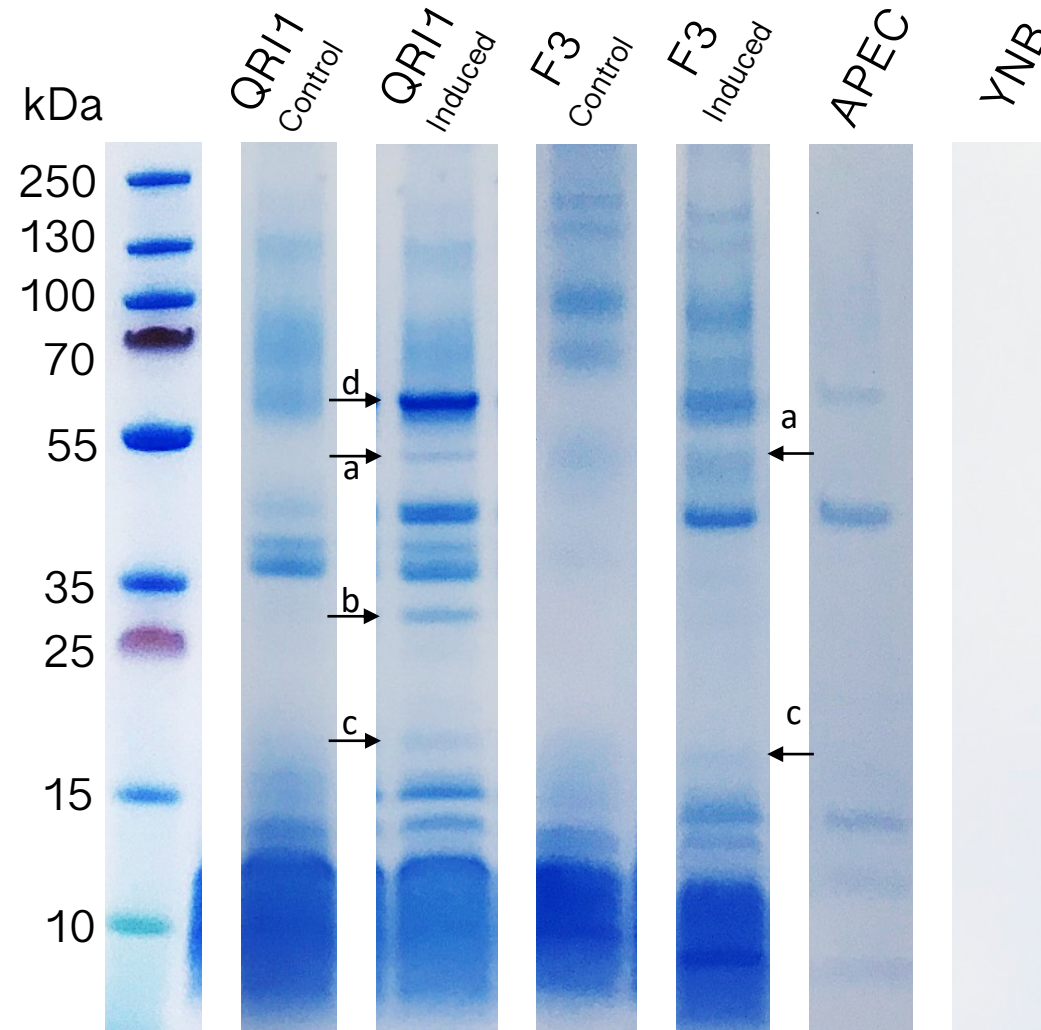

ladder

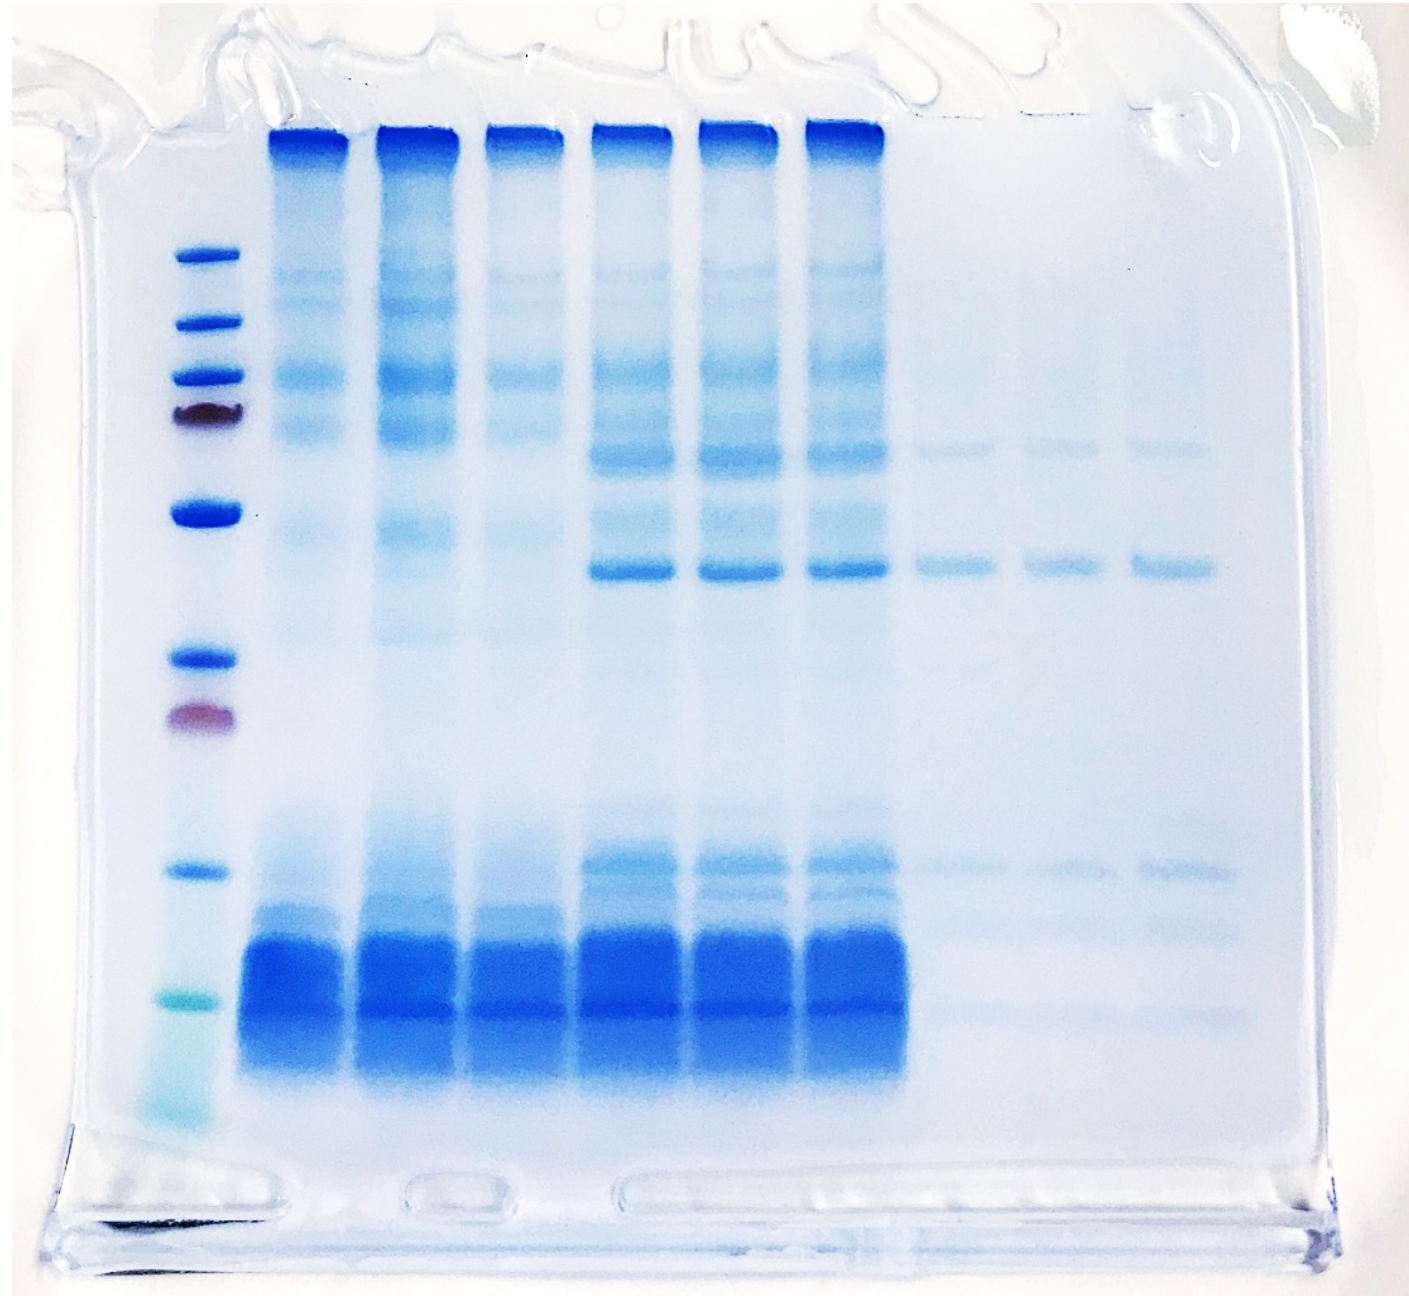

QR17  
Control

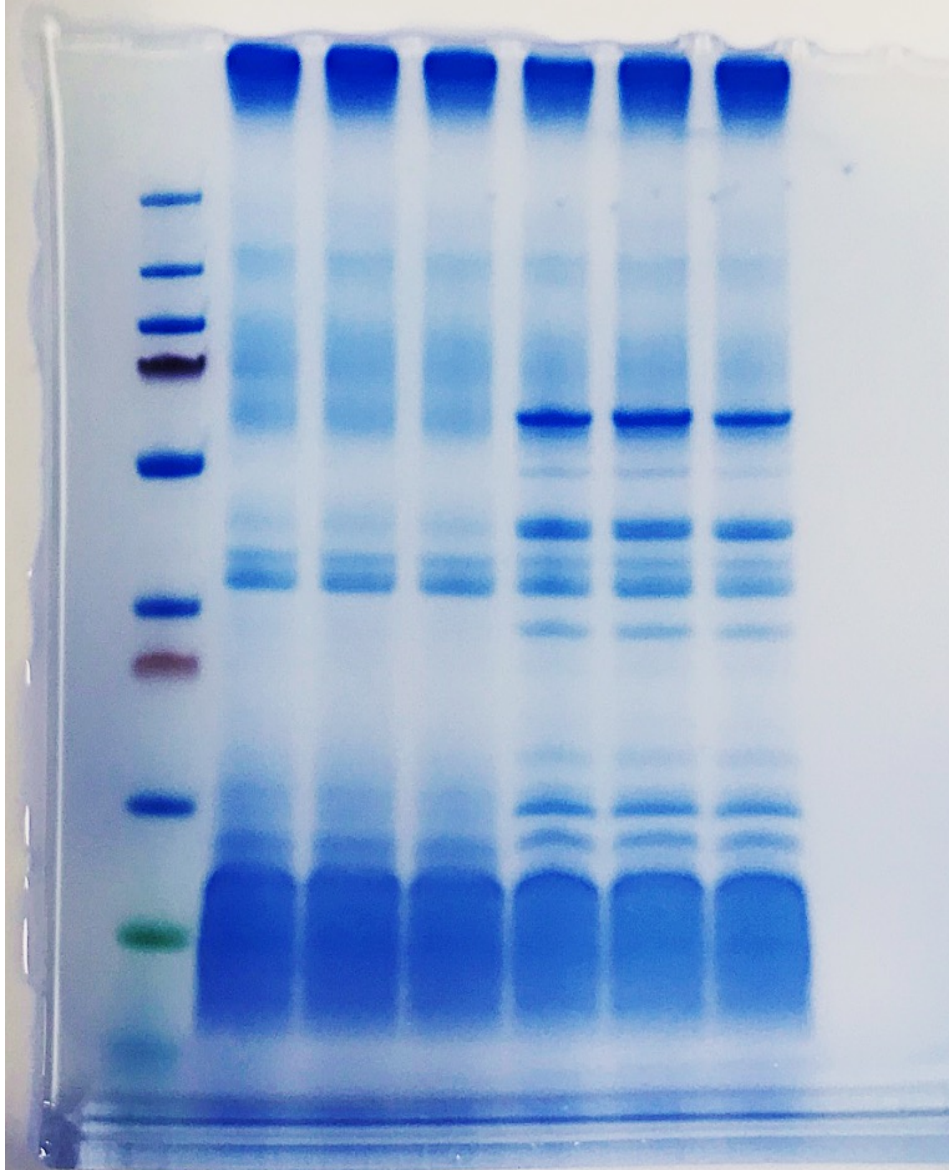



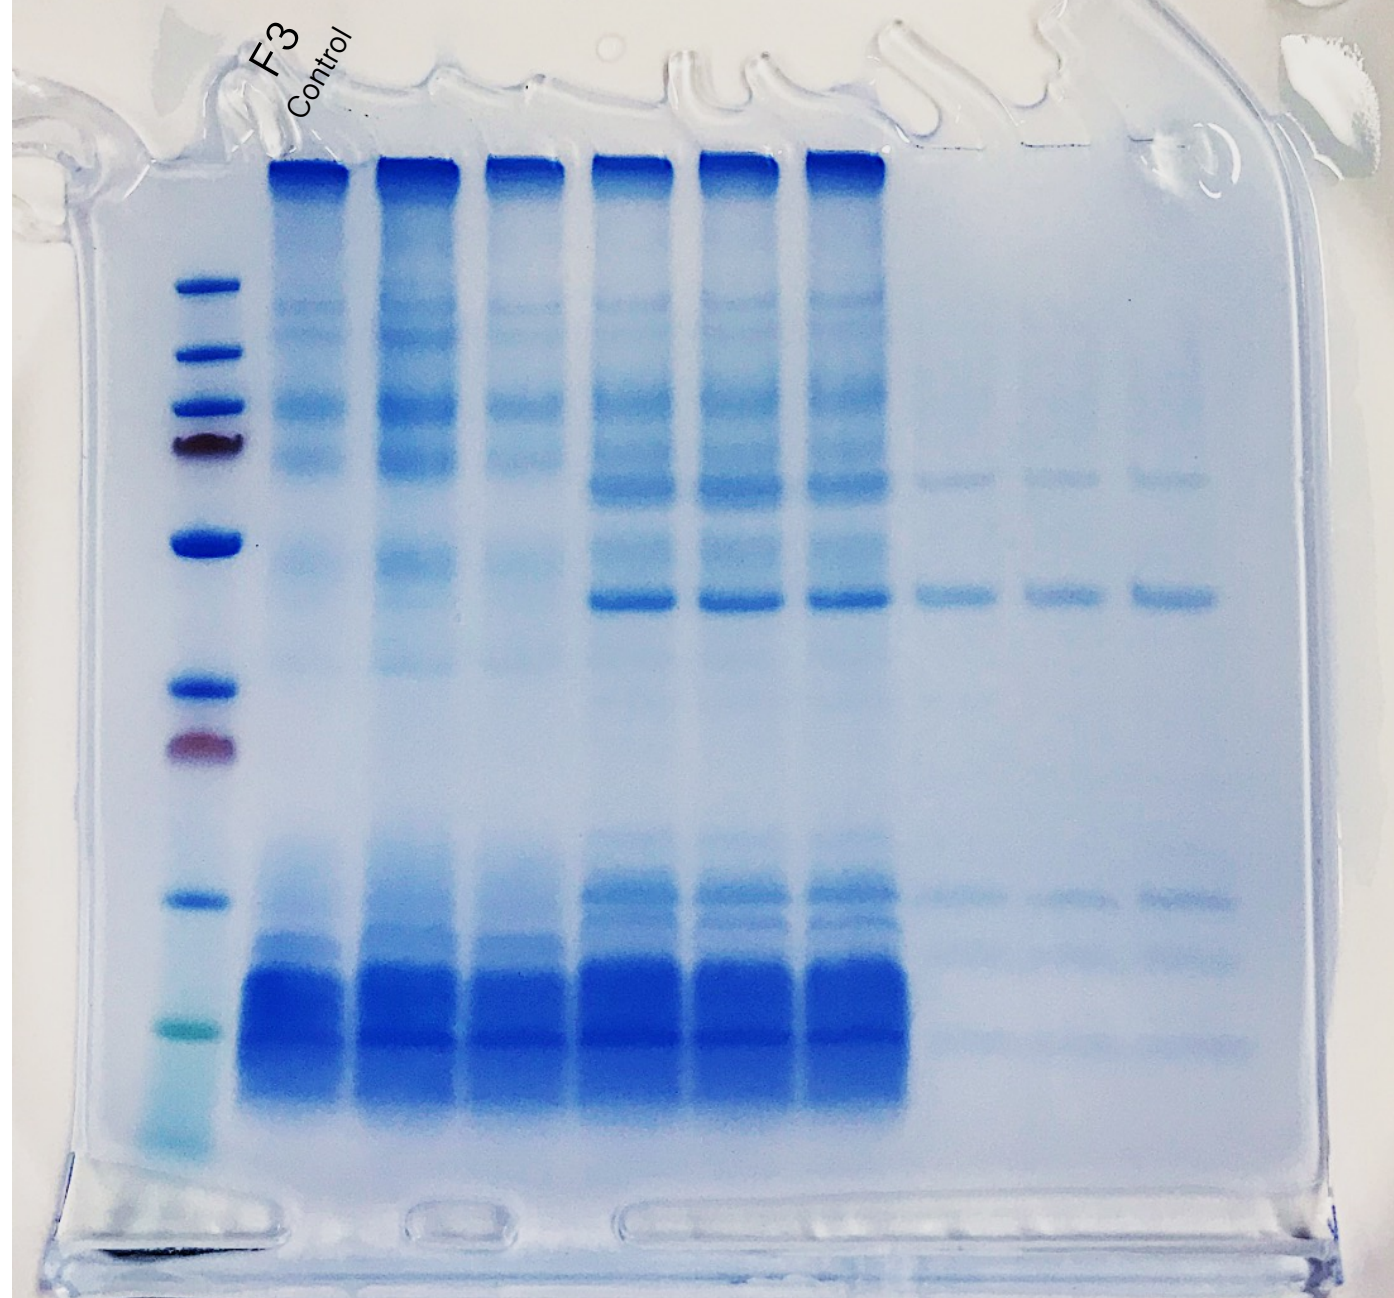

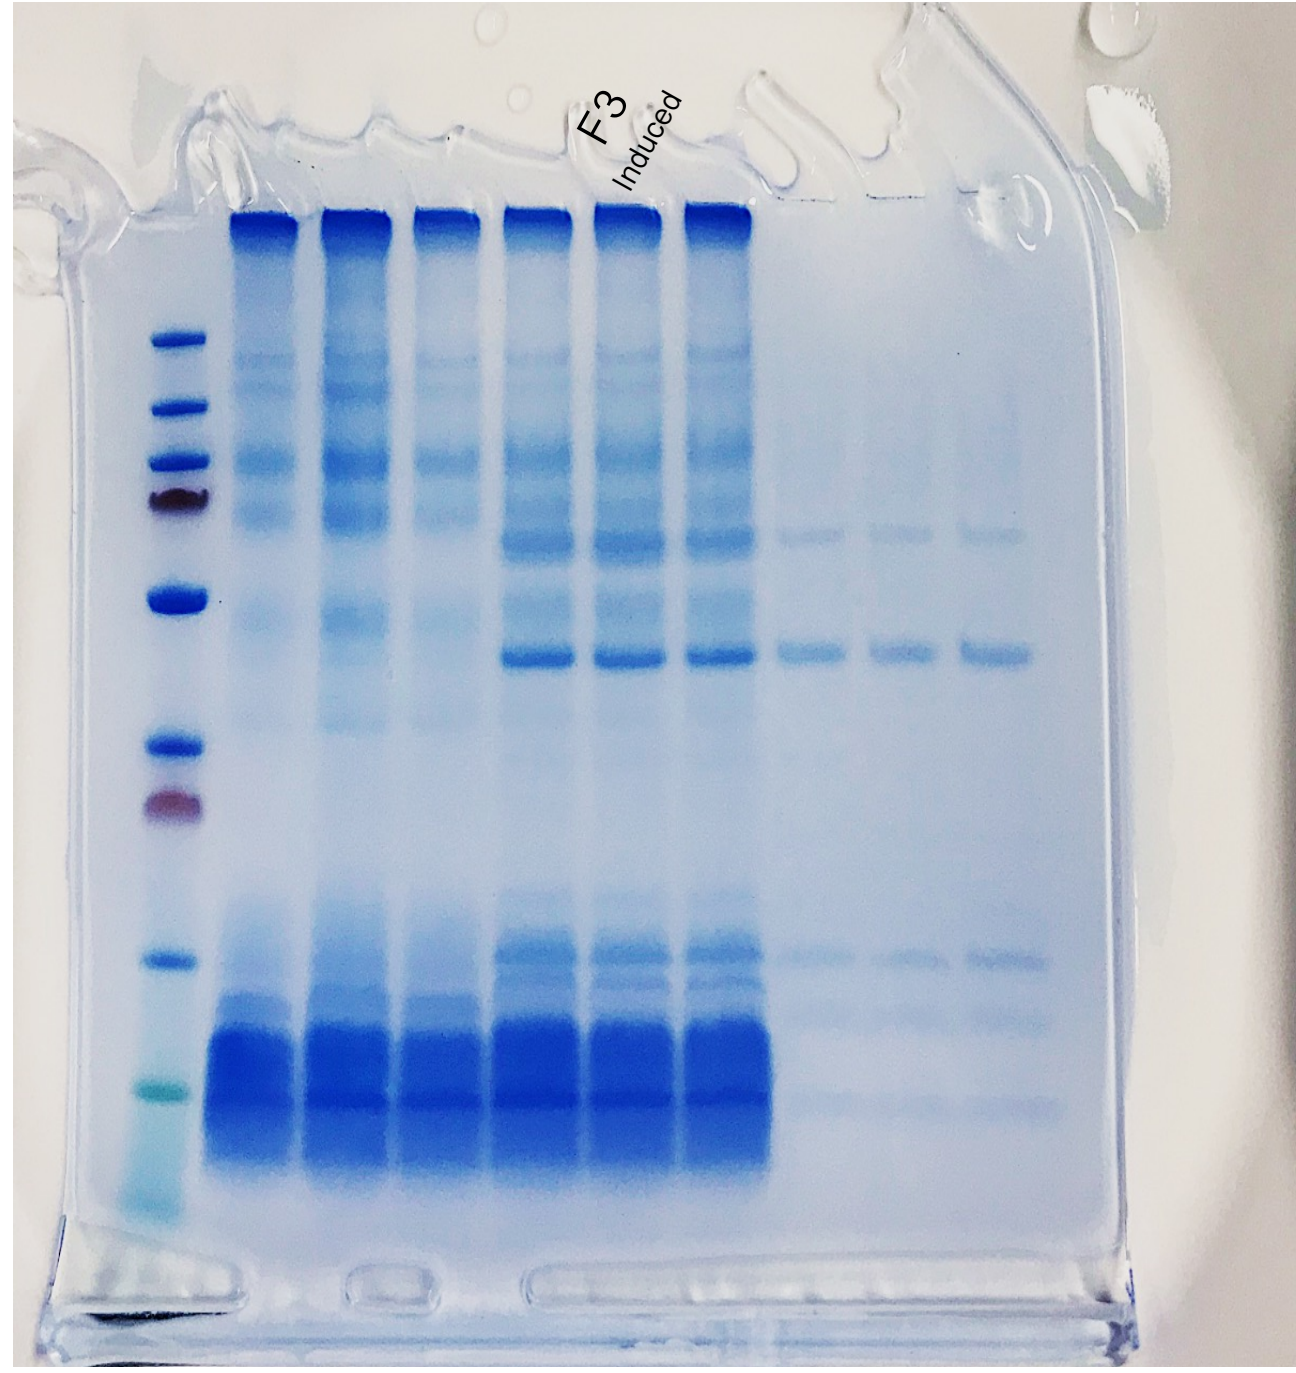



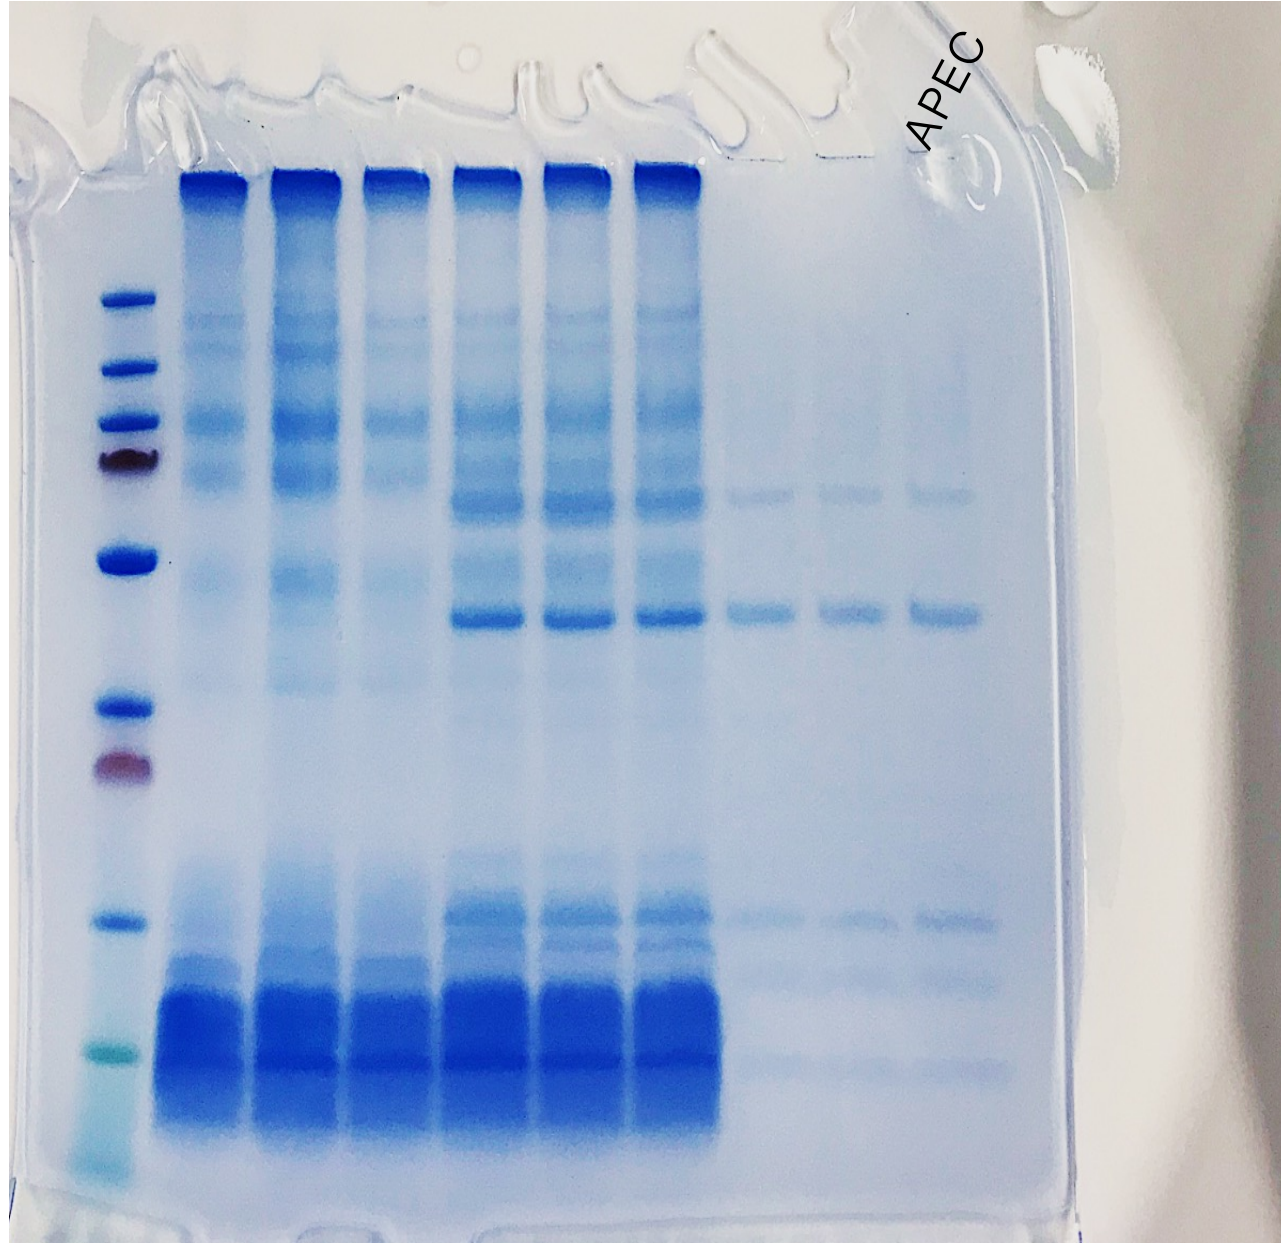

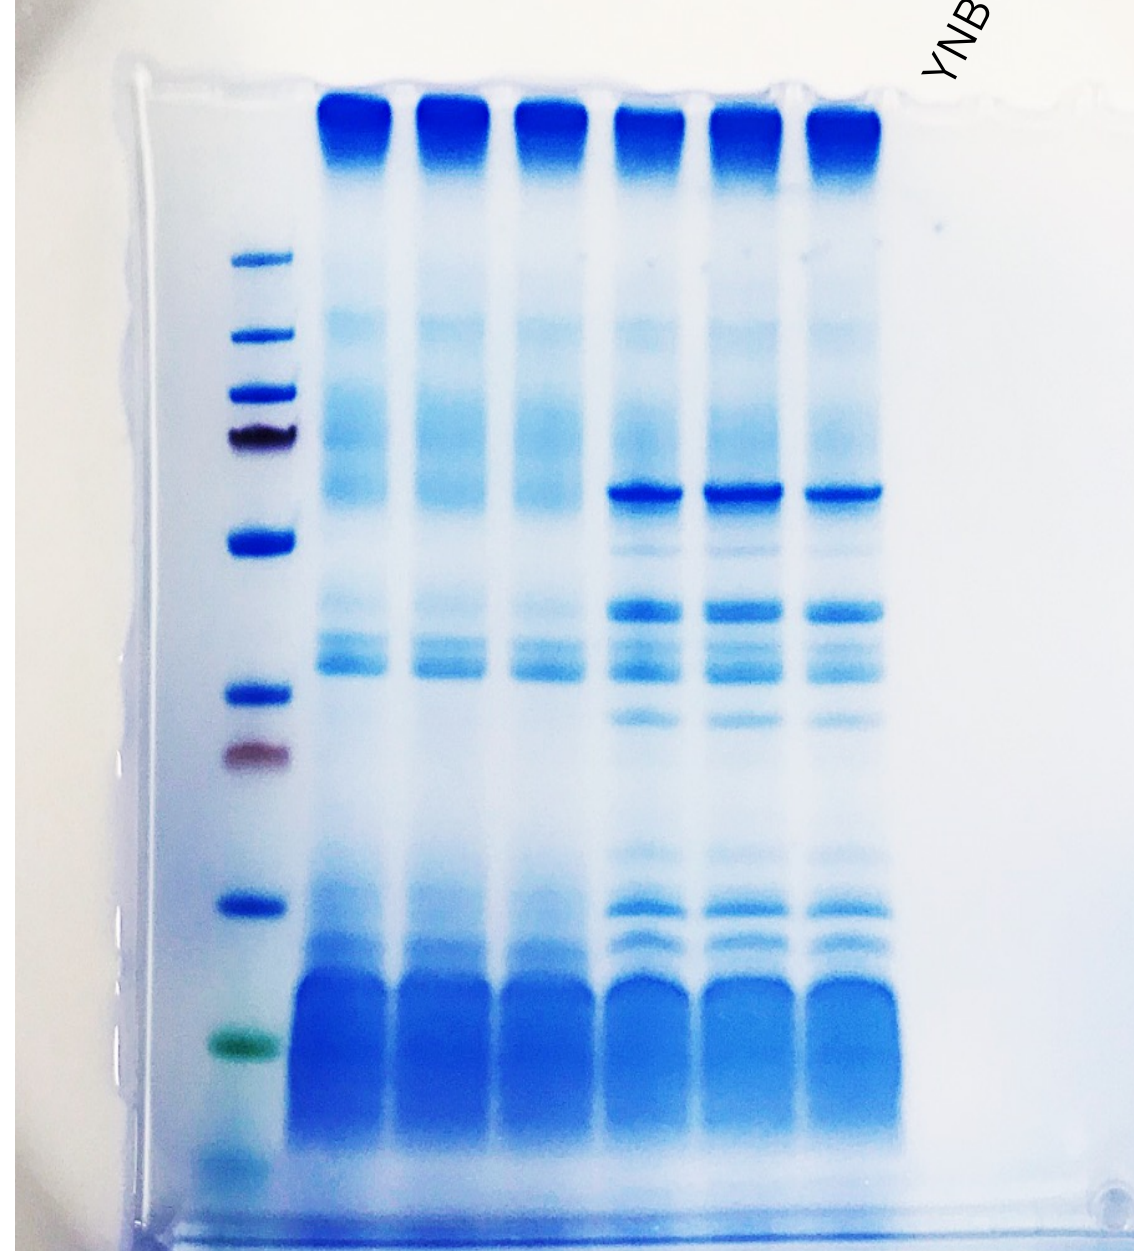

Supplement: s1 [file s1]
